# Supplementary material for: Synthesis and structural characterization, by spectroscopic and computational methods, of two fluorescent 3-hydroxy-4-pyridinone chelators bearing sulphorhodamine B and naphthalene
Source: Royal Society of Chemistry journal article supplement (doi:10.1039/c5ra23217a), 2015-12-28
Supplement: c5ra23217a1.pdf [file c5ra23217a1.pdf]

### Electronic Supplementary Information

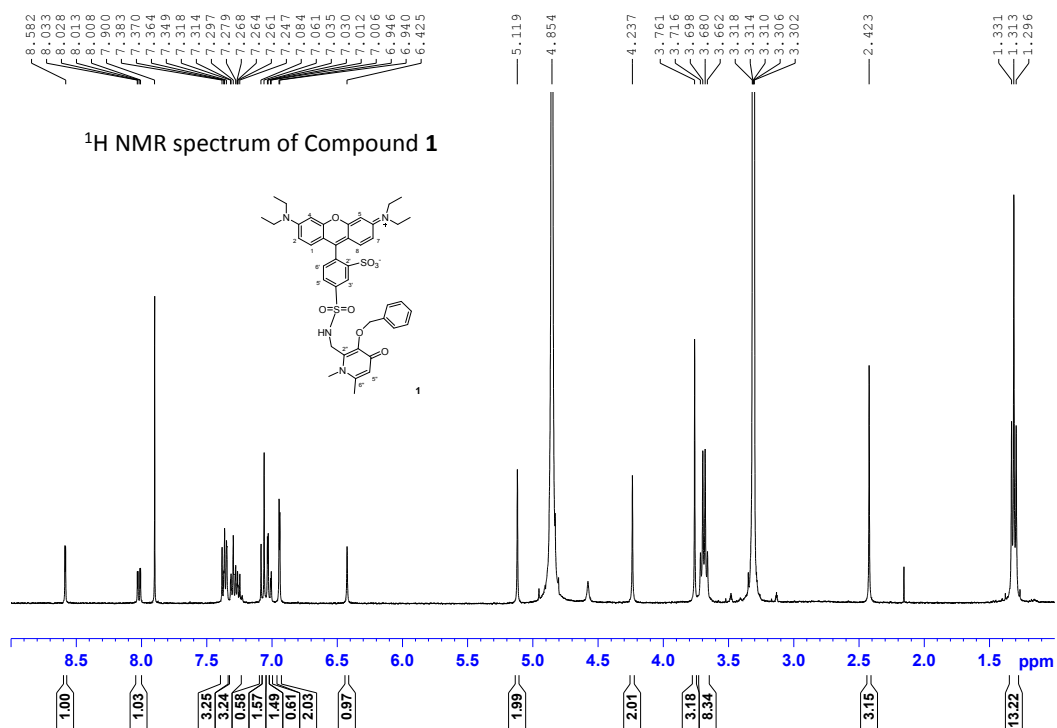

Figure S1. 400.15 MHz <sup>1</sup>H spectrum of compound **1**.

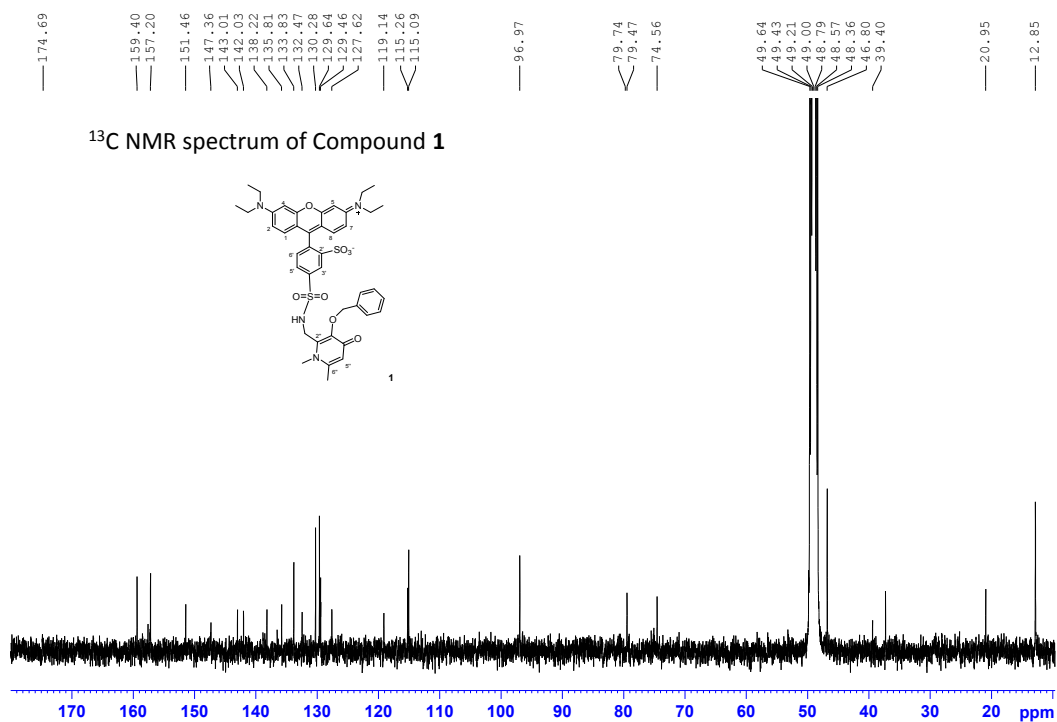

Figure S2. 400.15 MHz <sup>13</sup>C spectrum of compound **1**.

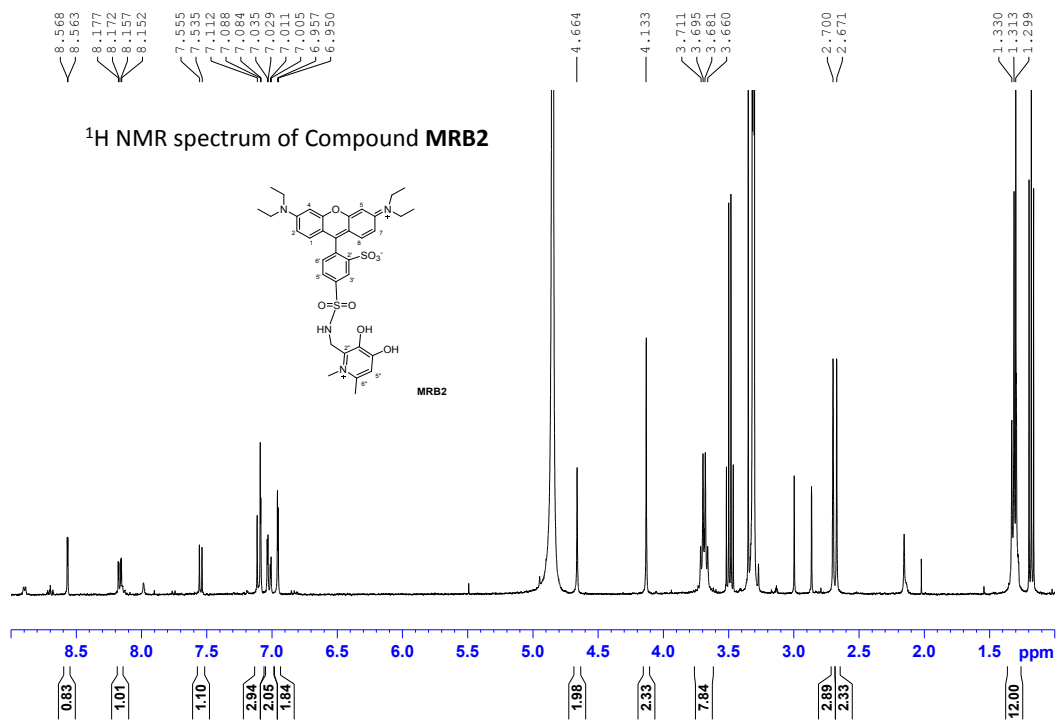

Figure S3. 400.15 MHz <sup>1</sup>H spectrum of compound MRB2.

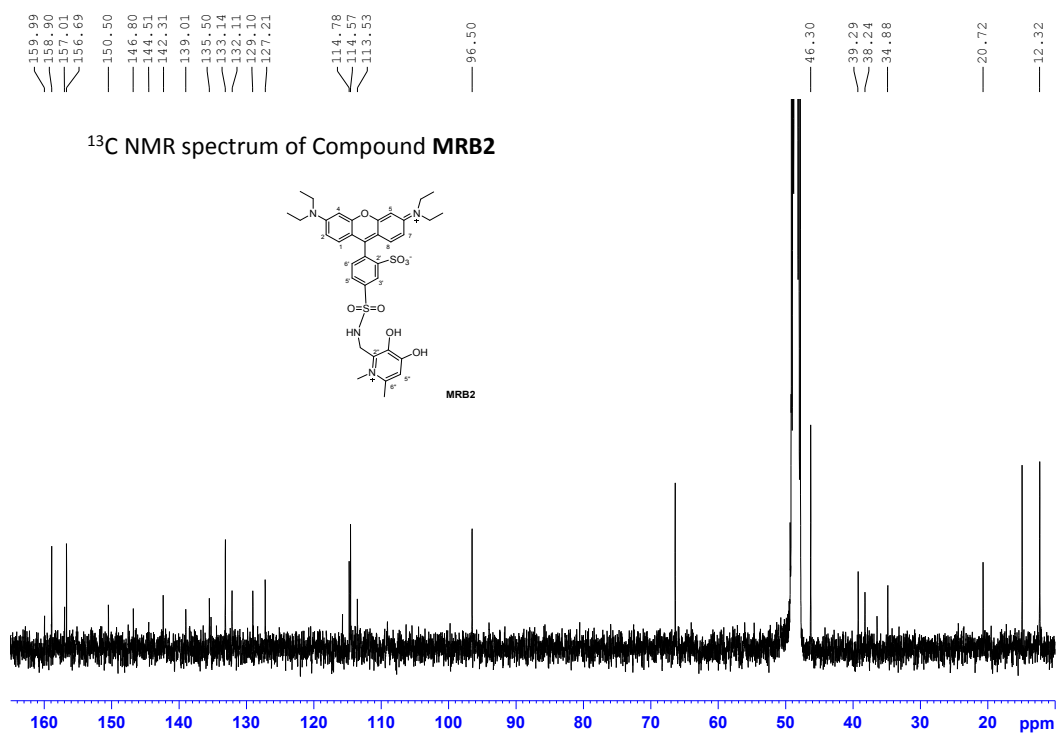

Figure S4. 400.15 MHz <sup>13</sup>C spectrum of compound MRB2.

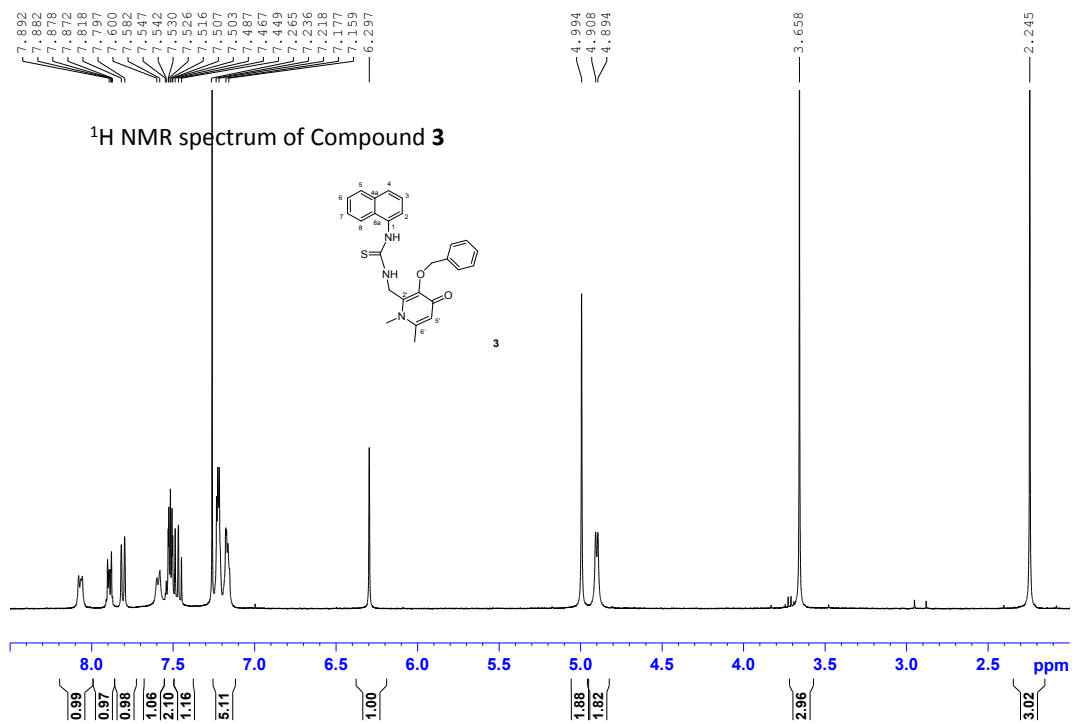

Figure S5. 400.15 MHz <sup>1</sup>H spectrum of compound 3.

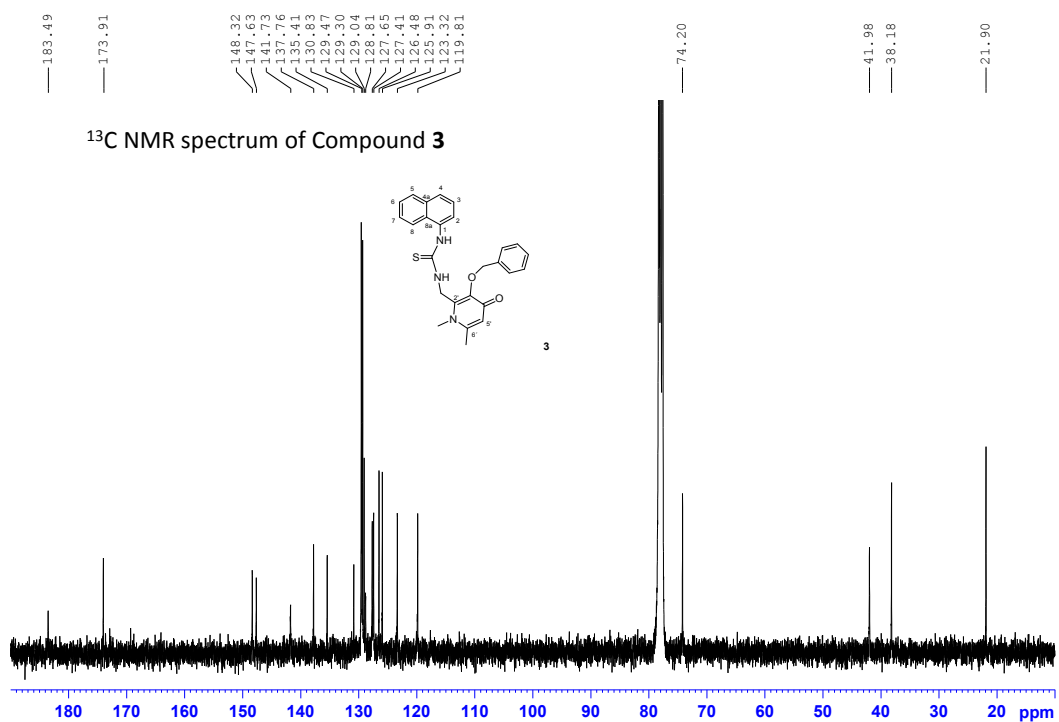

Figure S6. 400.15 MHz <sup>13</sup>C spectrum of compound 3.

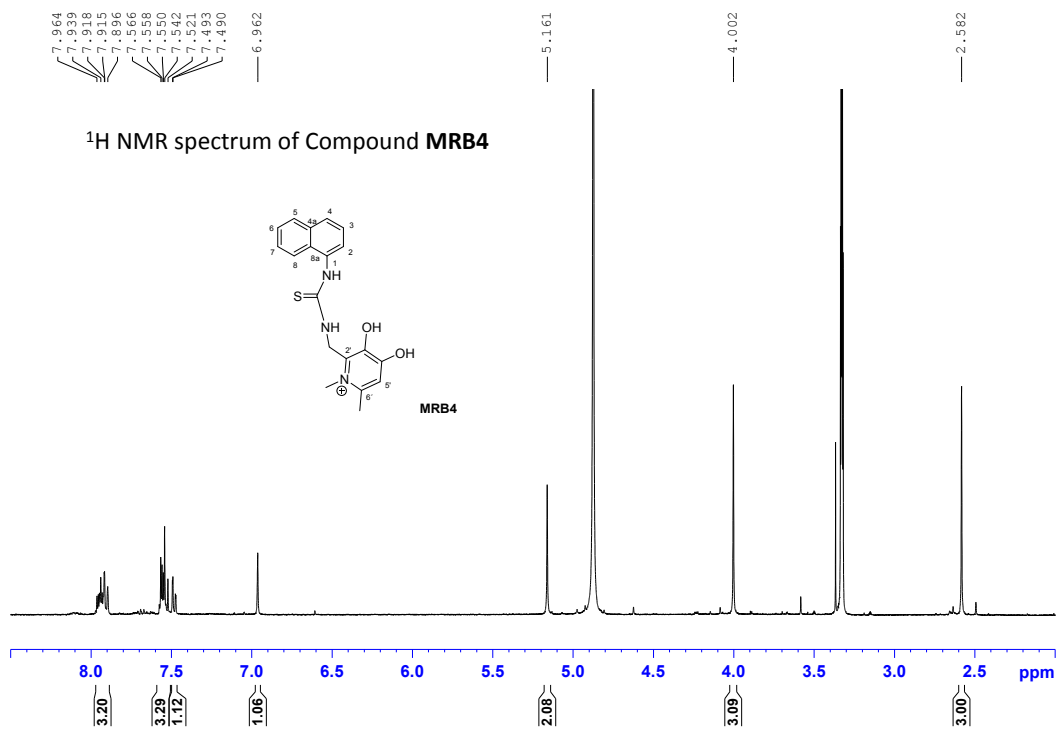

Figure S7. 400.15 MHz <sup>1</sup>H spectrum of compound MRB4.

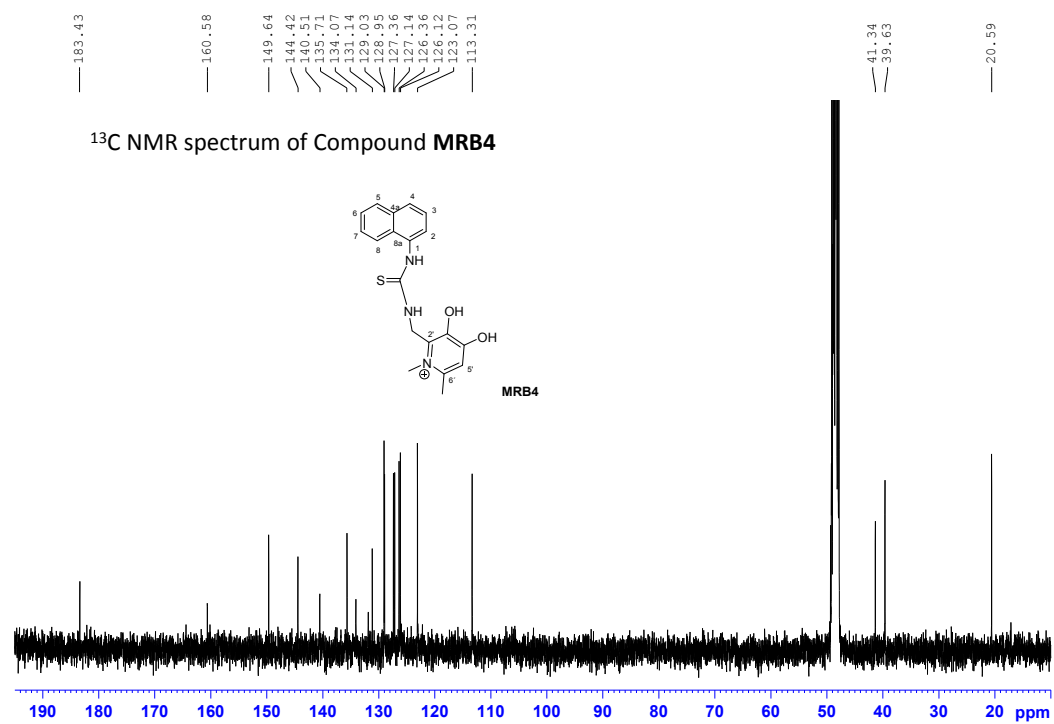

Figure S8. 400.15 MHz <sup>13</sup>C spectrum of compound MRB4.

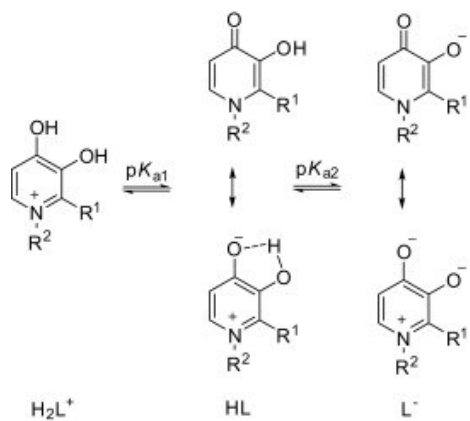

Figure S9. Dissociation equilibria of 3,4-HPO chelators in aqueous solution.

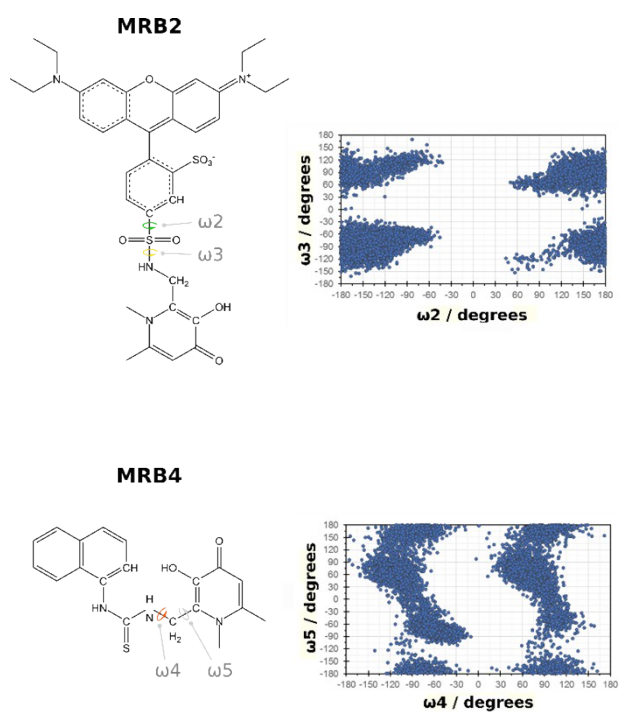

Figure S10. 2D maps of the dihedral values of the two most flexible torsions for compounds MRB2 and MRB4, along the MD simulations.
